# Supplementary material for: A sensitive electrochemical assay for T4 polynucleotide kinase activity based on titanium dioxide nanotubes and a rolling circle amplification strategy
Source: Royal Society of Chemistry journal article supplement (doi:10.1039/c8ra07745b), 2018-01-01
Supplement: c8ra07745b1.pdf [file c8ra07745b1.pdf]

## Supporting Information

### **A sensitive electrochemical assay for T4 polynucleotide kinase activity based on titanium dioxide nanotubes and rolling circle amplification strategy**

Yanli Zhang,<sup>a</sup> Xiang Fang,<sup>a</sup> Zhenyu Zhu,<sup>a</sup> Yanqiong Lai,<sup>a</sup> Chunli Xu,<sup>a</sup> Pengfei Pang,<sup>\*a</sup>  
Hongbin Wang,<sup>a</sup> Chun Yang,<sup>b</sup> Colin J. Barrow<sup>c</sup> and Wenrong Yang<sup>c</sup>

<sup>a</sup> Key Laboratory of Comprehensive Utilization of Mineral Resources in Ethnic Regions,  
Yunnan Minzu University, Kunming 650500, P. R. China

<sup>b</sup> Shaanxi Geological Survey Center, Xi'an 710068, P. R. China

<sup>c</sup> School of Life and Environmental Sciences, Deakin University, Geelong, VIC 3217,  
Australia

\* Corresponding author. Tel.: +86 871 65910017; fax: +86 871 65910017.

*E-mail address:* pengfeipang@yahoo.com (P. Pang)

### Supporting figure captions:

**Fig. S1** Electrophoresis analysis of the RCA products. Lane 1: DNA marker (500 bp), Lane 2: primer S2, Lane 3: circular template S3, Lane 4: circularization mixture, Lane 5: RCA product, Lane 6: DNA marker (5000 bp). The products were separated by 3% agarose gel electrophoresis and stained by bromophenol blue.

**Fig. S2** The effects of phosphorylation time (A), concentration of ATP (B), concentration of TiO<sub>2</sub> NTs (C), concentration of circularization mixture (D), RCA time (E), and concentration of phi29 DNA polymerase (F) on PNK activity assay. The assays were carried out in 10 mM Tris-HCl (pH 7.4, 0.1 M NaCl, 1 mM H<sub>2</sub>O<sub>2</sub> and 1 mM HQ) containing 20 U mL<sup>-1</sup> PNK.

**Fig. S3** The effects of concentration of S4 DNA (A), HRP-SA (B), H<sub>2</sub>O<sub>2</sub> (C), and HQ (D) on the electrochemical response of the biosensor. The assays were carried out in 10 mM Tris-HCl (pH 7.4) containing 20 U mL<sup>-1</sup> PNK.

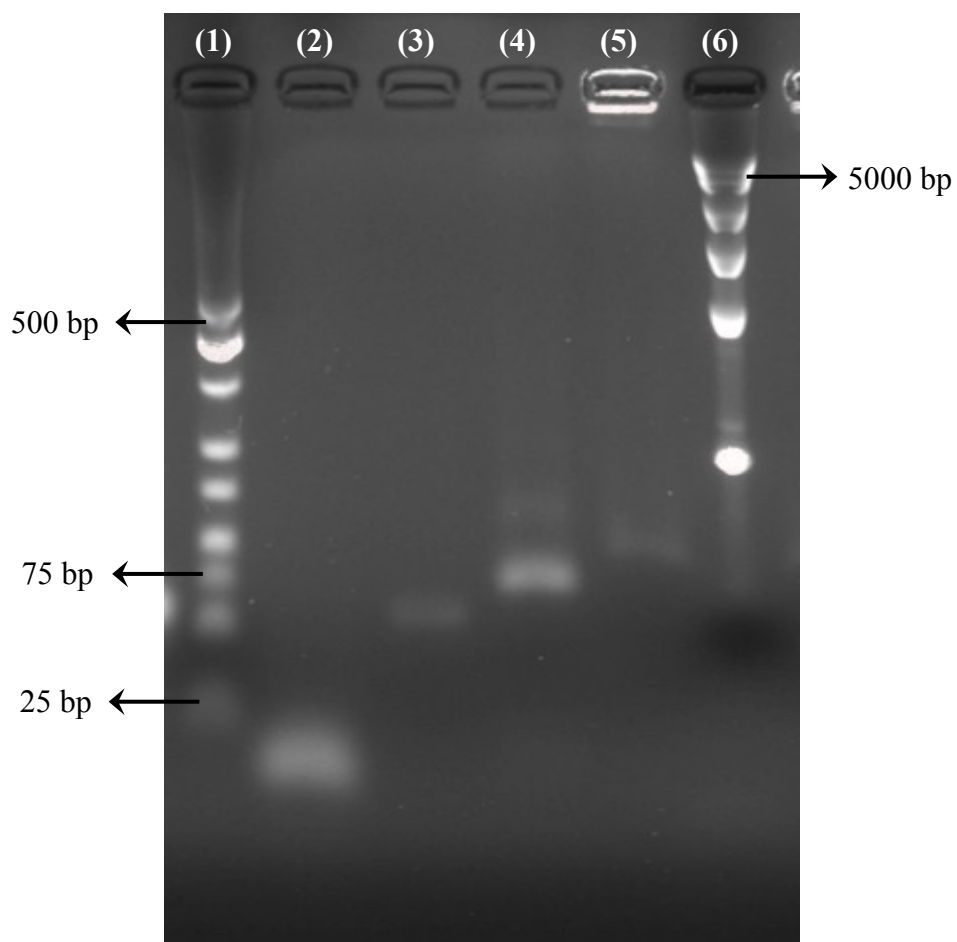

**Fig. S1** Electrophoresis analysis of the RCA products. Lane 1: DNA marker (500 bp), Lane 2: primer S2, Lane 3: circular template S3, Lane 4: circularization mixture, Lane 5: RCA product, Lane 6: DNA marker (5000 bp). The products were separated by 3% agarose gel electrophoresis and stained by bromophenol blue.

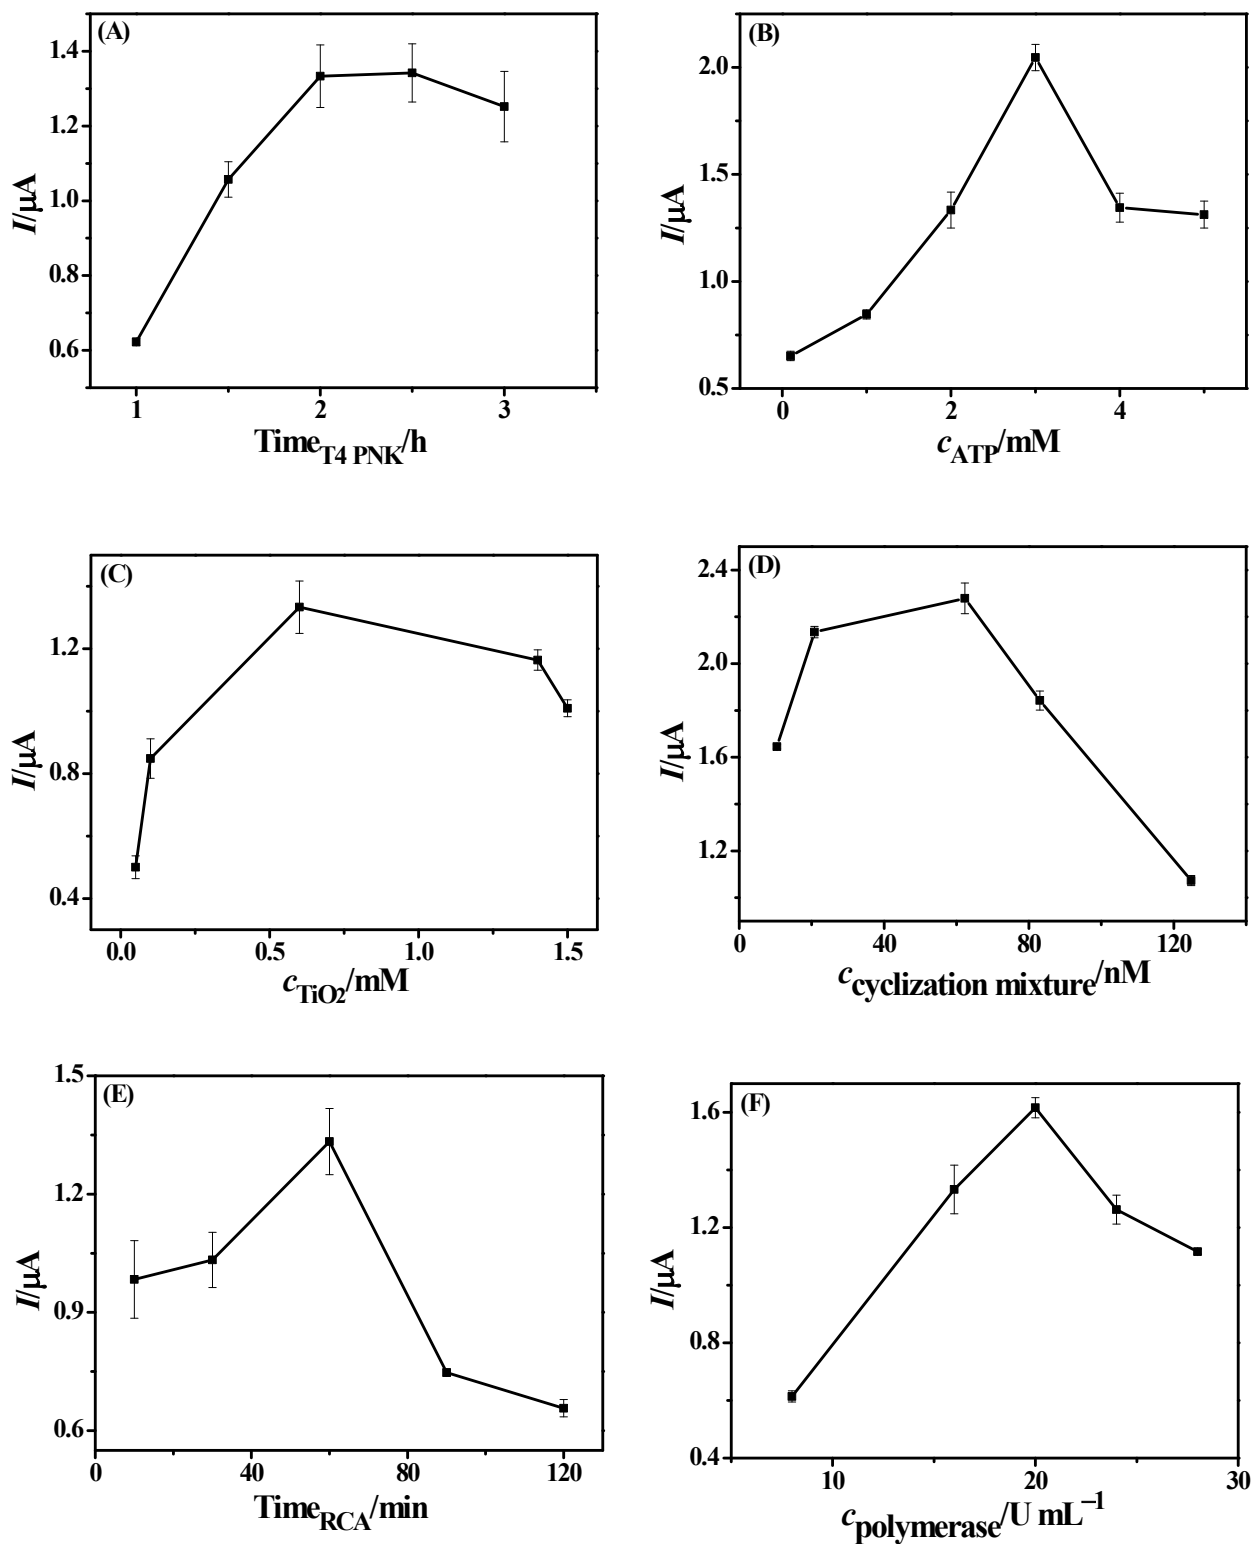

**Fig. S2** The effects of phosphorylation time (A), concentration of ATP (B), concentration of TiO<sub>2</sub> NTs (C), concentration of circularization mixture (D), RCA time (E), and concentration of phi29 DNA polymerase (F) on PNK activity assay. The assays were carried out in 10 mM Tris-HCl (pH 7.4, 0.1 M NaCl, 1 mM H<sub>2</sub>O<sub>2</sub> and 1 mM HQ) containing 20 U mL<sup>-1</sup> PNK.

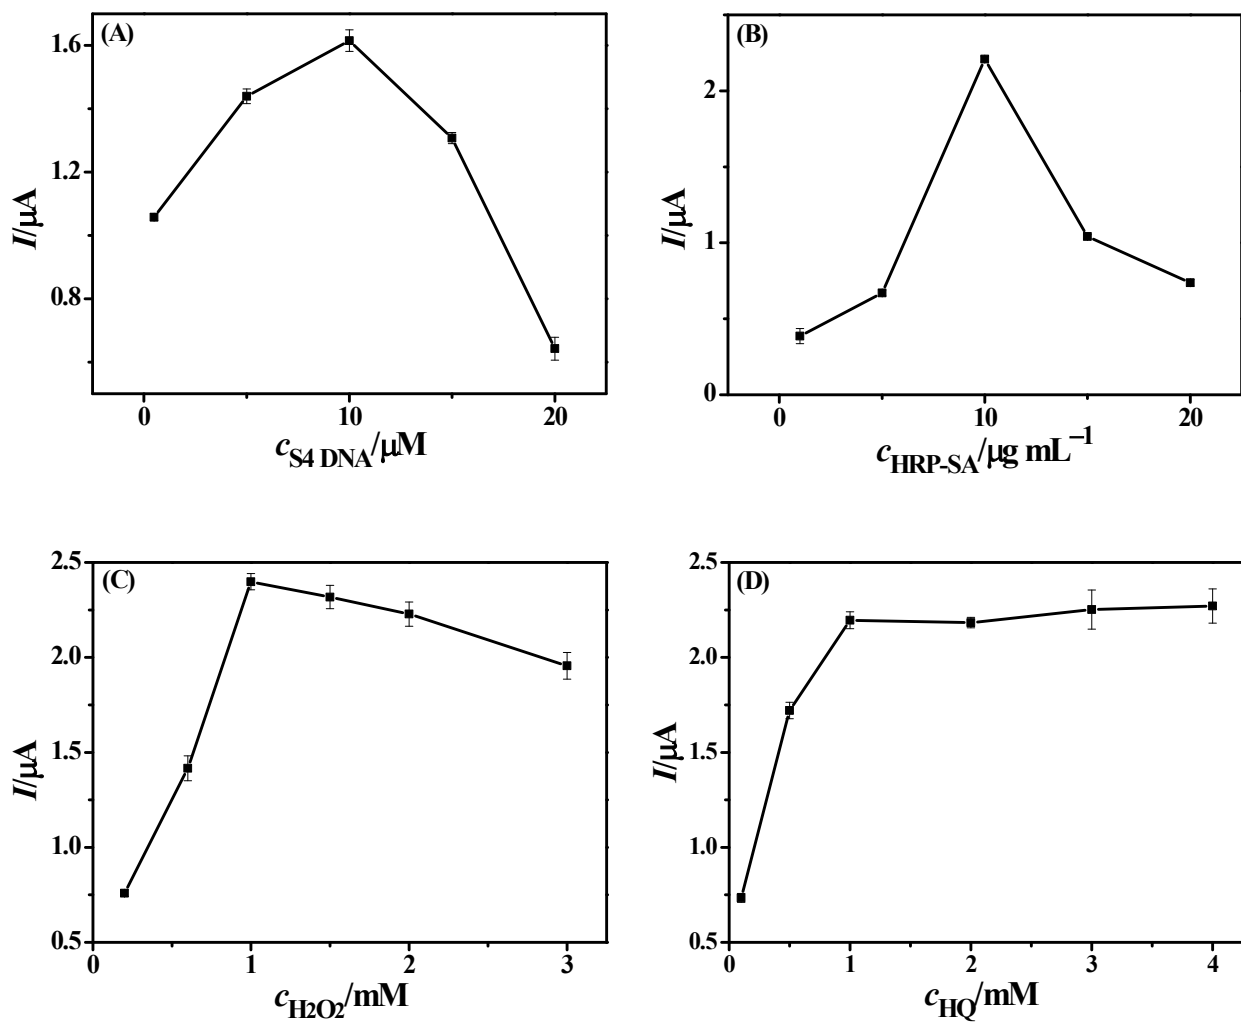

**Fig. S3** The effects of concentration of S4 DNA (A), HRP-SA (B),  $\text{H}_2\text{O}_2$  (C), and HQ (D) on the electrochemical response of the biosensor. The assays were carried out in 10 mM Tris-HCl (pH 7.4) containing 20  $\text{U mL}^{-1}$  PNK.
